1 **High-throughput immunoassays for SARS-CoV-2 – considerable differences in**  
2 **performance when comparing three methods**

3 *Oskar Ekelund, MD<sup>1,2</sup>, Kim Ekblom, MD, PhD<sup>3,4</sup>, Sofia Somajo, MSc, PhD<sup>2</sup>, Johanna*  
4 *Pattison-Granberg PhD<sup>3</sup>, Karl Olsson, BSc<sup>2</sup>, and Annika Petersson, MSc, PhD<sup>3</sup>*

5 <sup>1</sup>Department of Clinical Microbiology, Växjö Central Hospital, Växjö, Sweden; <sup>2</sup>Department  
6 of Clinical Microbiology, Blekinge County Hospital, Karlskrona, Sweden; <sup>3</sup>Department of  
7 Clinical Chemistry and Transfusion Medicine, Växjö Central Hospital, Växjö, Sweden;

8 <sup>4</sup>Department of Medical Biosciences, Clinical Chemistry, Umeå University, Umeå, Sweden

9

10 **Corresponding author:** Annika Petersson  
11 Department of Clinical Chemistry and Transfusion Medicine  
12 Centrallasarettet Växjö  
13 SE-35185 Växjö  
14 Sweden  
15 phone +46 (0)470 58 7978  
16 cell phone +46 (0) 767 259609  
17 e-mail [annika.petersson@kronoberg.se](mailto:annika.petersson@kronoberg.se)  
18  
19

20 **Running head:** Serology methods for SARS-CoV-2

21 **Author ORCID ID:** Oskar Ekelund 0000-0001-6621-0244

22 Kim Ekblom 0000-0003-2844-1310

23 Sofia Somajo 0000-0003-0433-8079

24 Johanna Pattison-Granberg 0000-0002-3979-996X

25 Karl Olsson -

26 Annika Petersson 0000-0002-4582-3567

27

28 **Abstract**

29 *Background:* The recently launched high-throughput assays for the detection of antibodies  
30 against SARS-CoV-2 may change the managing strategies for the COVID-19 pandemic. This  
31 study aimed at investigating the performance of three high-throughput assays and one rapid  
32 lateral flow test relative to the recommended criteria defined by regulatory authorities.

33 *Methods:* A total of 133 samples, including 100 pre-pandemic samples, 20 samples from  
34 SARS-CoV-2 RT-PCR positive individuals, and 13 potentially cross-reactive samples were  
35 analysed with SARS-CoV-2 IgG (Abbott), Elecsys Anti-SARS-CoV-2 (Roche), LIAISON  
36 SARS-CoV-2 S1/S2 IgG (DiaSorin) and 2019-nCoV IgG/IgM Rapid Test (Dynamiker  
37 Biotechnology Co).

38 *Results:* All assays performed with a high level of specificity; however, only Abbott reached  
39 100% (95% CI 96.3-100). The pre-pandemic samples analysed with Roche, DiaSorin and  
40 Dynamiker Biotechnology resulted in two to three false-positive results per method  
41 (specificity 96.9-98.0%). Sensitivity differed more between the assays, Roche exhibiting the  
42 highest sensitivity (100%, CI 83.9-100). The corresponding figures for Abbott, DiaSorin and  
43 Dynamiker Biotechnology were 85.0%, 77.8% and 75.0%, respectively.

44 *Conclusions:* The results of the evaluated SARS-CoV-2 assays vary considerably as well as  
45 their ability to fulfil the performance criteria proposed by regulatory authorities. Introduction  
46 into clinical use in low-prevalent settings, should therefore, be made with caution.

47

48 **Keywords:** COVID-19, SARS-CoV-2, serology, immunology, antibodies

49

50 **Introduction**

51 Coronavirus disease 2019 (COVID-19) was first reported in Wuhan, Hubei province, China,  
52 in December 2019 [1]. The virus causing this disease has since been designated SARS-CoV-2  
53 [2]. The clinical manifestations of COVID-19 range from mild or no respiratory symptoms to  
54 severe viral pneumonia with a need of intensive care and ventilator support. Due to the rapid  
55 dissemination of the infection, the outbreak was declared a pandemic by the World Health  
56 Organization (WHO) on 11<sup>th</sup> March 2020 [3].

57 RT-PCR detection of SARS-CoV-2 in samples primarily obtained from  
58 nasopharyngeal and/or pharyngeal swabs is considered gold standard for laboratory  
59 confirmation of COVID-19 in patients. However, the presence of viral nucleic acids is  
60 transient, and results are dependent on the time of sampling.

61 Detection of antibodies against the SARS-CoV-2 virus could possibly be used to  
62 distinguish patients recovered from COVID-19, and several rapid tests based on  
63 immunochromatographic techniques have been developed. These point-of-care tests usually  
64 deliver results within 15-30 minutes, however the nature of the tests makes large-scale testing  
65 inefficient.

66 To achieve high-throughput detection of anti-SARS-CoV-2 antibodies in plasma  
67 or serum, several manufacturers have developed immunoassays based on recognition of  
68 recombinant antigens. Some tests claim to detect IgM or IgG, while others also identify IgA  
69 or a mixture of different classes of antibodies. Differences in test design, including choice of  
70 antigen, are likely to affect the sensitivity and specificity of the tests [4]. In this study, the  
71 performance of three commercially available high-throughput automated SARS-CoV-2  
72 antibody assays, and one rapid immunochromatographic test, was investigated and compared  
73 to recommended criteria set by regulatory authorities.

74

## 75 **Materials and Methods**

### 76 *Assays*

77 Four commercially available CE marked immunoassays, and their corresponding platforms  
78 were used: 1) Abbott SARS-CoV-2 IgG on the ARCHITECT i2000 (Abbott, Illinois, USA);  
79 2) Elecsys Anti-SARS-CoV-2 on the Cobas 8000 e801 (Roche Diagnostic Scandinavia AB,  
80 Solna, Sweden); 3) LIAISON SARS-CoV-2 S1/S2 IgG on the LIAISON XL (DiaSorin,  
81 Saluggia, Italy); and 4) the lateral flow test 2019-nCoV IgG/IgM Rapid Test (Dynamiker  
82 Biotechnology Co., Tianjin, China).

83           The Abbott SARS-CoV-2 IgG reagent is based on the recognition of IgG  
84 antibodies binding to recombinant SARS-CoV-2 nucleoprotein in a chemiluminescent  
85 microparticle immunoassay (CMIA). Results are obtained after 29 minutes, and are reported  
86 as an index with a cut-off to distinguish between negative and positive results.

87           The Elecsys Anti-SARS-CoV-2 assay is based on recombinantly produced  
88 SARS-CoV-2 nucleocapsid (N) protein and detects antibodies (including IgG). The duration  
89 of the analysis is approximately 18 minutes, with results presented as a cut-off index as well  
90 as reactive or non-reactive.

91           The LIAISON SARS-CoV-2 S1/S2 detects IgG antibodies recognising the spike  
92 glycoprotein of the coronavirus. As for the previous assays, the antigen is composed of  
93 recombinant protein expressed in human cell lines. The analysis takes 35 minutes, and the  
94 results are expressed as IgG antibody concentrations in arbitrary units (AU/mL) graded  
95 negative, equivocal, or positive.

96           The manually performed 2019-nCoV IgG/IgM Rapid Test recognises and  
97 differentiates IgG from IgM antibodies; however, information on antigen source is scarce.  
98 The test result could be obtained after approximately 10 minutes as visual bands across the  
99 assay paper strip, any positive result, either for IgG, IgM, or both, was considered positive.

100 Despite the short reaction time, as compared with the automatic tests, high-throughput  
101 analysis of a large number of samples using the manual test procedure is implausible.

102 All automated systems are part of the routine operations in our laboratories and  
103 were as such subjected to accepted quality assurance procedures. All tests (including  
104 calibration and controls) were performed according to manufacturers' instructions, using  
105 serum samples.

106

### 107 *Sample collections*

108 All samples in the study originated from an existing sample collection at the Microbiology  
109 department obtained after consent to deposit, store, and use for research and development.  
110 Samples were fully anonymised prior to inclusion, and results could hence not be linked to  
111 individuals. As a consequence, the study did not require approval from an ethics committee,  
112 according to the guidelines of the Swedish Ethical Review Agency. All serum samples were  
113 stored at -20°C until analysis.

114 The specificity of each assay was evaluated using 100 pre-pandemic (2018)  
115 samples. To challenge the assays, 13 additional serum samples with possible interferences  
116 (antinuclear antibodies (n=2); rheumatoid factor (n=2); anti-cytomegalovirus IgM (n=2); anti-  
117 Epstein-Barr virus IgM (n=2) and samples from pregnant donors (n=5)) were analysed.

118 Assay sensitivities were evaluated using 20 outpatient serum samples from 16  
119 individuals that prior to serum sampling had tested RT-PCR positive for SARS-CoV-2 from  
120 nasopharyngeal and/or pharyngeal swabs. RT-PCR had been performed using primers and  
121 probes targeting either the envelope (E) and the polymerase (RdRP) genes of SARS-CoV-2 as  
122 described by Corman [5], or the nucleocapsid gene (N) of the virus (Abbott RealTime SARS-  
123 CoV-2 Assay, Abbott Molecular Inc., Illinois, USA). The interval between onset of COVID-  
124 19 symptoms and serum sample collection ranged from 18 to 52 days (median 38 days).

125 *Calculations*

126 Overall per cent agreement, sensitivity (per cent positive agreement), and specificity (per cent  
127 negative agreement) were calculated based on a contingency table according to EP12-A2 [6],  
128 using Microsoft Excel 2019 (Microsoft Corp. Redmond, WA, USA). The between-test  
129 agreement was evaluated using Cohen's kappa calculated with IBM SPSS Statistics for  
130 Windows, Version 26.0 (IBM Corp., Armonk, NY, USA). For each assay, the positive  
131 likelihood ratio (LR+) and positive predictive value (PPV) at different prevalence (P)  
132 scenarios were calculated according to equation 1 and 2, respectively.

133 
$$LR+ = sensitivity / (1 - specificity) \quad (\text{Eq. 1})$$

134 
$$PPV = (sensitivity \times P) / ((sensitivity \times P) + (1 - specificity) \times (1 - P)) \quad (\text{Eq. 2})$$

135 Further data analysis, including descriptive statistics, was performed using GraphPad Prism,  
136 version 7.04 for Windows (GraphPad Software, La Jolla California USA,  
137 [www.graphpad.com](http://www.graphpad.com)).

138

139 *Clinical Performance Requirements*

140 The performance of each assay was compared with published guidelines from three regulatory  
141 authorities: the Public Health Agency of Sweden (PHAS); Haute Autorité de Santé, France  
142 (HAS); and Centres for Disease Control and Prevention, USA (CDC) [7-9]. Their  
143 recommended performance criteria are summarized in Table 1.

144 **Results**

145 Of the 100 pre-pandemic samples, nine tested false positive, two with Roche, five with  
146 DiaSorin (including two equivocal results) and two with Dynamiker Biotechnology (figure 1).  
147 The negative sample collection resulted in median values of 0.09 COI (0.08-3.16), 0.04 S/CO

148 (0.01-0.6) and 5.7 AU/mL (1.9-32.6) for Roche, Abbott and DiaSorin, respectively. The panel  
149 consisting of 13 potentially cross-reactive pre-pandemic samples mainly gave negative  
150 results. However, for Dynamiker Biotechnology, one sample with rheumatoid factor IgM was  
151 positive for both SARS-CoV-2 IgM and IgG. Also, one sample obtained during pregnancy  
152 showed an equivocal result on the DiaSorin assay. In contrast, all these samples were negative  
153 on the Abbott and Roche assays.

154 Three RT-PCR positive samples gave a weak positive result with Roche, close  
155 to the cut-off (1.01 to 1.26, cut-off  $\geq 1.0$ ) (Figure 1). These samples were reported as negative  
156 by DiaSorin, Dynamiker Biotechnology, and Abbott. However, for these samples, the Abbott  
157 values clearly differed from the rest of the Abbott negative samples by being close to the cut-  
158 off (0.81-1.06, cut-off  $\geq 1.4$ ).

159 The overall agreement was 97.5% for Abbott, 98.3% for Roche, 94.0% for  
160 DiaSorin, and 94.2% for Dynamiker Biotechnology. The pairwise inter-assay agreement  
161 (Cohen's kappa) was as follows: Roche and Abbott 0.847 (95% CI, 0.718 to 0.976); Roche  
162 and Diasorin 0.654 (95% CI, 0.474 to 0.830); Roche and Dynamiker Biotechnology 0.794  
163 (95% CI, 0.647 to 0.941); Abbott and DiaSorin 0.777 (95% CI, 0.618 to 0.936); Abbott and  
164 Dynamiker Biotechnology 0.804 (95% CI, 0.653 to 0.817); and DiaSorin and Dynamiker  
165 Biotechnology 0.724 (95% CI, 0.533 to 0.895).

166 The calculated sensitivity and specificity for each assay is presented in Table 2,  
167 together with the corresponding data extracted from each manufacturer's test kit insert. In the  
168 present study Abbott exhibited the highest specificity and Roche the highest sensitivity, both  
169 being 100%. Two RT-PCR positive samples and two samples from the negative collection  
170 were excluded from the DiaSorin sample collection due to equivocal results. The positive

171 likelihood ratios (LR+) were  $\infty$ , 50.0, 25.1 and 37.5 for Abbott, Roche, DiaSorin and  
172 Dynamiker Biotechnology, respectively.

173 Benchmarking the sensitivity and specificity data from the current study against  
174 published guidelines showed that the Abbott assay met the specificity criteria set by all three  
175 regulatory bodies. The specificities of Roche and Dynamiker Biotechnology were both in  
176 accordance with the HAS guidelines, while DiaSorin, in contrast, failed to reach any of the  
177 specificity criteria. Neither of the assays from Abbott, DiaSorin and Dynamiker  
178 Biotechnology exhibited a sufficient sensitivity to meet the criteria set by PHAS and HAS. In  
179 contrast, Roche performed excellent in this regard, with a sensitivity of 100%.

180 Assay performance recommendations from PHAS are based on a target PPV of  
181 > 90%. To demonstrate the seroprevalence required to reach a PPV of > 90%, the PPV based  
182 on sensitivity and specificity data from the present study as well as from the manufacturers,  
183 was calculated (Figure 2).

## 184 **Discussion**

185 As the pandemic progresses, it will likely become increasingly important not only to establish  
186 ongoing COVID-19 but also to confirm past infection of SARS-CoV-2. On a community  
187 level, this could be used for assessing the progress of the pandemic and for guiding public  
188 health and control policies [10]. On an individual level, a reliable method for proving past  
189 COVID-19 could potentially be important for allowing employees to remain at work despite  
190 mild respiratory symptoms. It could even serve as a basis for a proposed “immunity passport”  
191 [11, 12]. Although the degree of immunity to SARS-CoV-2 is disputed, it is plausible that  
192 individuals undergoing COVID-19 will gain partial or temporary protection against new  
193 episodes [13]. Serology tests might also be used to identify donors of convalescent plasma,  
194 which has been proposed for the treatment of seriously ill COVID-19 patients [14].



195                    However, the rapidly emerging pandemic limits the possibility of state-of-the-art  
196        validations according to the EP-12 A2 [6], and there is no international consensus on clinical  
197        performance requirements for COVID-19 assays. Neither is there an agreed gold standard  
198        method for antibody testing [15]. Using the performance criteria proposed by PHAS, HAS  
199        and CDC [7-9], only Abbott managed to reach the specificity recommended by all three  
200        authorities while Roche alone fulfilled the sensitivity criteria (PHAS, HAS).

201                    The clinical performance of a qualitative diagnostic test is, with few exceptions,  
202        heavily dependent on the prevalence. Both PHAS and CDC accordingly link their respective  
203        specificity criteria for SARS-CoV-2 antibody testing to seroprevalence levels. PHAS  
204        recommends that a PPV > 90% shall be pursued, regardless of seroprevalence. Based on our  
205        results prevalences of approximately 15%, 20% and 25% would be necessary to reach this  
206        goal for Roche, Dynamiker Biotechnology and DiaSorin, respectively (Figure 2). In contrast,  
207        Abbott would in this regard perform well at any given seroprevalence, owing to its specificity  
208        of 100%.

209                    Due to the limited sample size of the study, our results need to be interpreted  
210        with caution. Nevertheless, a recent study based on 65 RT-PCR positive and 1154 pre-  
211        COVID-19 samples [16] reported similar assay performances, except for the sensitivity of  
212        Roche being higher in our study. In contrast, evaluating four different assays using the same  
213        outpatient sample collection strengthens this study. Moreover, an aspect not investigated in  
214        this study is that assay performance could potentially vary with sample type (serum, plasma,  
215        whole blood).

216                    Judging by the results from this study, introducing broad antibody testing for  
217        COVID-19 will be cumbersome in a low-prevalence setting. In order to reach the proposed  
218        performance criteria, two-tier testing will have to be considered. Alternatively, a high degree  
219        of specificity (and thus a high positive predictive value) could be prioritised using modified

220 cut-off values. Our results suggest that this could be conceivable for the Abbott and Roche  
221 assays, while the more narrowly distributed results for DiaSorin would make it difficult to  
222 find such a specific cut-off with a reasonably preserved degree of sensitivity (Figure 1).

223           Considering the novelty of the disease, and hence the expedited development of  
224 new assays, possible sources of systematic errors (e.g. cross-reacting antibodies against other  
225 *Coronaviridae*) need to be carefully considered. In this study, all eleven false-positive  
226 samples originated from unique donors, none of the samples being positive in more than one  
227 assay. Further investigation of possible reasons for the false-positive results is, however,  
228 beyond the scope of this evaluation.

229           We conclude that the SARS-CoV-2 assays only partly fulfil the performance  
230 criteria proposed by regulatory authorities. Introduction into clinical use in low-prevalent  
231 settings, must therefore, be made with careful consideration and well-informed stakeholders.

232

### 233 **Acknowledgements**

234 The expert technical assistance of Ola Forsell and Susanna Bergqvist at the Department of  
235 Clinical Chemistry and Transfusion Medicine, Växjö Central Hospital, and of Sanna  
236 Hjalmarsson, Christina Bojesson and Eline Boesen at the Department of Clinical  
237 Microbiology, Region Kronoberg, is greatly appreciated.

238

239 **Declaration of interest statement:** The authors declare that they have no conflicts of interest  
240 relevant to the manuscript submitted to Infectious Diseases. There is no funding to report.

241

242 **References**

- 243 [1] N. Zhu, D. Zhang, W. Wang, X. Li, B. Yang, J. Song, X. Zhao, B. Huang, W. Shi, R. Lu, P. Niu,  
244 F. Zhan, X. Ma, D. Wang, W. Xu, G. Wu, G.F. Gao, W. Tan, I. China Novel Coronavirus, T.  
245 Research, A Novel Coronavirus from Patients with Pneumonia in China, 2019, N Engl J Med 382(8)  
246 (2020) 727-733.
- 247 [2] A.E. Gorbalenya, S.C. Baker, R.S. Baric, R.J. De Groot, C. Drosten, A.A. Gulyaeva, B.L.  
248 Haagmans, C. Lauber, A.M. Leontovich, B.W. Neuman, D. Penzar, S. Perlman, L.L.M. Poon, D.  
249 Samborskiy, I.A. Sidorov, I. Sola, J. Ziebuhr, Severe acute respiratory syndrome-related coronavirus:  
250 The species and its viruses – a statement of the Coronavirus Study Group, Cold Spring Harbor  
251 Laboratory, 2020.
- 252 [3] WHO, Virtual press conference on COVID-19–11 March 2020.  
253 <[https://www.who.int/docs/default-source/coronaviruse/transcripts/who-audio-emergencies-](https://www.who.int/docs/default-source/coronaviruse/transcripts/who-audio-emergencies-coronavirus-press-conference-full-and-final-11mar2020.pdf?sfvrsn=cb432bb3_2)  
254 [coronavirus-press-conference-full-and-final-11mar2020.pdf?sfvrsn=cb432bb3\\_2](https://www.who.int/docs/default-source/coronaviruse/transcripts/who-audio-emergencies-coronavirus-press-conference-full-and-final-11mar2020.pdf?sfvrsn=cb432bb3_2)>, 2020 (accessed 6th  
255 May.2020).
- 256 [4] Z. Zainol Rashid, S.N. Othman, M.N. Abdul Samat, U.K. Ali, K.K. Wong, Diagnostic  
257 performance of COVID-19 serology assays, Malays J Pathol 42(1) (2020) 13-21.
- 258 [5] V.M. Corman, O. Landt, M. Kaiser, R. Molenkamp, A. Meijer, D.K. Chu, T. Bleicker, S. Brunink,  
259 J. Schneider, M.L. Schmidt, D.G. Mulders, B.L. Haagmans, B. van der Veer, S. van den Brink, L.  
260 Wijsman, G. Goderski, J.L. Romette, J. Ellis, M. Zambon, M. Peiris, H. Goossens, C. Reusken, M.P.  
261 Koopmans, C. Drosten, Detection of 2019 novel coronavirus (2019-nCoV) by real-time RT-PCR,  
262 Euro Surveill 25(3) (2020).
- 263 [6] P.E. Garrett, F.D. Lasky, K.L. Meier, L.W. Clark, Clinical and Laboratory Standards Institute.,  
264 User protocol for evaluation of qualitative test performance : approved guideline, 2nd ed., Clinical and  
265 Laboratory Standards Institute, Wayne, Pa., 2008.
- 266 [7] Folkhälsomyndigheten (Public Health Agency of Sweden), Vägledning för antikroppspåvisning.  
267 <<https://www.folkhalsomyndigheten.se/contentassets/2c3d8e40926e4bcc942aa640922bb758/vagledningi>  
268 [ng-antikroppspavisning.pdf](https://www.folkhalsomyndigheten.se/contentassets/2c3d8e40926e4bcc942aa640922bb758/vagledningi)>, 2020 (accessed 3 Jul.2020).

- 269 [8] Haute Autorité de Santé, Specifications setting out the performance assessment methods  
270 applicable to serological tests detecting anti-SARS-CoV-2 antibodies. <[https://www.has-](https://www.has-sante.fr/upload/docs/application/pdf/2020-05/has_serological_tests_covid19_specifications.pdf)  
271 [sante.fr/upload/docs/application/pdf/2020-05/has\\_serological\\_tests\\_covid19\\_specifications.pdf](https://www.has-sante.fr/upload/docs/application/pdf/2020-05/has_serological_tests_covid19_specifications.pdf)>, 2020  
272 (accessed Jul 31.2020).
- 273 [9] Centers for Disease Control and Prevention, Interim Guidelines for COVID-19 Antibody Testing;  
274 Interim Guidelines for COVID-19 Antibody Testing in Clinical and Public Health Settings.  
275 <<https://www.cdc.gov/coronavirus/2019-ncov/lab/resources/antibody-tests-guidelines.html>>, 2020  
276 (accessed Jul 31.2020).
- 277 [10] S.E.F. Yong, D.E. Anderson, W.E. Wei, J. Pang, W.N. Chia, C.W. Tan, Y.L. Teoh, P.  
278 Rajendram, M. Toh, C. Poh, V.T.J. Koh, J. Lum, N.M. Suhaimi, P.Y. Chia, M.I. Chen, S. Vasoo, B.  
279 Ong, Y.S. Leo, L. Wang, V.J.M. Lee, Connecting clusters of COVID-19: an epidemiological and  
280 serological investigation, *Lancet Infect Dis* (2020).
- 281 [11] A.L. Phelan, COVID-19 immunity passports and vaccination certificates: scientific, equitable,  
282 and legal challenges, *Lancet* (2020).
- 283 [12] N.J. Beeching, T.E. Fletcher, M.B.J. Beadsworth, Covid-19: testing times, *BMJ* 369 (2020)  
284 m1403.
- 285 [13] L. Bao, W. Deng, H. Gao, C. Xiao, J. Liu, J. Xue, Q. Lv, J. Liu, P. Yu, Y. Xu, F. Qi, Y. Qu, F. Li,  
286 Z. Xiang, H. Yu, S. Gong, M. Liu, G. Wang, S. Wang, Z. Song, W. Zhao, Y. Han, L. Zhao, X. Liu, Q.  
287 Wei, C. Qin, Reinfection could not occur in SARS-CoV-2 infected rhesus macaques, *bioRxiv* (2020)  
288 2020.03.13.990226.
- 289 [14] R. Rubin, Testing an Old Therapy Against a New Disease: Convalescent Plasma for COVID-19,  
290 *JAMA* (2020).
- 291 [15] European Commission, Guidelines on COVID-19 in vitro diagnostic tests and their performance  
292 (2020/C 122 I/01) <[https://eur-lex.europa.eu/legal-](https://eur-lex.europa.eu/legal-content/EN/TXT/PDF/?uri=OJ:C:2020:122I:FULL&from=SV)  
293 [content/EN/TXT/PDF/?uri=OJ:C:2020:122I:FULL&from=SV](https://eur-lex.europa.eu/legal-content/EN/TXT/PDF/?uri=OJ:C:2020:122I:FULL&from=SV)>, 2020 (accessed Aug. 4.2020).
- 294 [16] T. Perkmann, N. Perkmann-Nagele, M.-K. Breyer, R. Breyer-Kohansal, O.C. Burghuber, S. Hartl,  
295 D. Aletaha, D. Sieghart, P. Quehenberger, R. Marculescu, P. Mucher, R. Strassl, O.F. Wagner, C.J.

296 Binder, H. Haslacher, Side by side comparison of three fully automated SARS-CoV-2 antibody assays  
297 with a focus on specificity, medRxiv (2020) 2020.06.04.20117911.

298

299 Table 1. Summary of recommended criteria for SARS-CoV-2 serology assays issued by authorities in three different countries.

| <b>Regulatory Authority</b>                     | <b>Sensitivity (%)</b> | <b>Specificity (%)</b> | <b>Additional comment</b>                                                        |
|-------------------------------------------------|------------------------|------------------------|----------------------------------------------------------------------------------|
| Public Health Agency of Sweden                  | 90.0                   | 99.5                   | Recommendations based on a seroprevalence of 5%, rendering a target PPV of > 90% |
| Haute Autorité de Santé, France                 | 95.0                   | 98.0                   |                                                                                  |
| Centers for Disease Control and Prevention, USA | -                      | 99.5                   | For populations with seroprevalence of $\geq 5\%$                                |

300

301

302

303

304

305

306

307 Table 2. Sensitivity and specificity from this study, and according to the manufacturers' data. The results are compared to manufacturers' data  
 308 from samples collected >14 days (Abbott, Roche) and >15 days (DiaSorin) post PCR confirmation. No information about time of sampling was  
 309 available for Dynamiker Biotechnology.

|           | Study Data |                           |     |                           | Manufacturer's Data* |                         |      |                         |
|-----------|------------|---------------------------|-----|---------------------------|----------------------|-------------------------|------|-------------------------|
|           | n          | Sensitivity %<br>(95% CI) | n   | Specificity %<br>(95% CI) | n                    | Sensitivity<br>(95% CI) | n    | Specificity<br>(95% CI) |
| Abbott    | 20         | 85.0 (64.0-94.8)          | 100 | 100 (96.3-100)            | 73                   | 100 (95.1-100)          | 997  | 99.6 (99.0-99.9)        |
| Roche     | 20         | 100 (83.9-100)            | 100 | 98.0 (93.0-99.5)          | 185                  | 99.5 (97.0-100)         | 6305 | 99.8 (99.7-99.9)        |
| DiaSorin  | 18         | 77.8 (54.8-91.0)          | 98  | 96.9 (91.4-99.0)          | 39                   | 97.4 (86.8-99.5)        | 90   | 98.9 (94.0-99.8)        |
| Dynamiker | 20         | 75.0 (53.1-88.8)          | 100 | 98.0 (93.0-99.5)          | 162                  | 93.2 (not reported)     | 300  | 95.3 (not reported)     |

310 \* Data retrieved from following versions of product kit inserts: Abbott 06R86 G90418R01, April 2020; Roche V3, 2020-06; DiaSorin 200/007-797, 03, 2020-04; Dynamiker  
 311 Biotechnology DNK-1419-1.

312

313

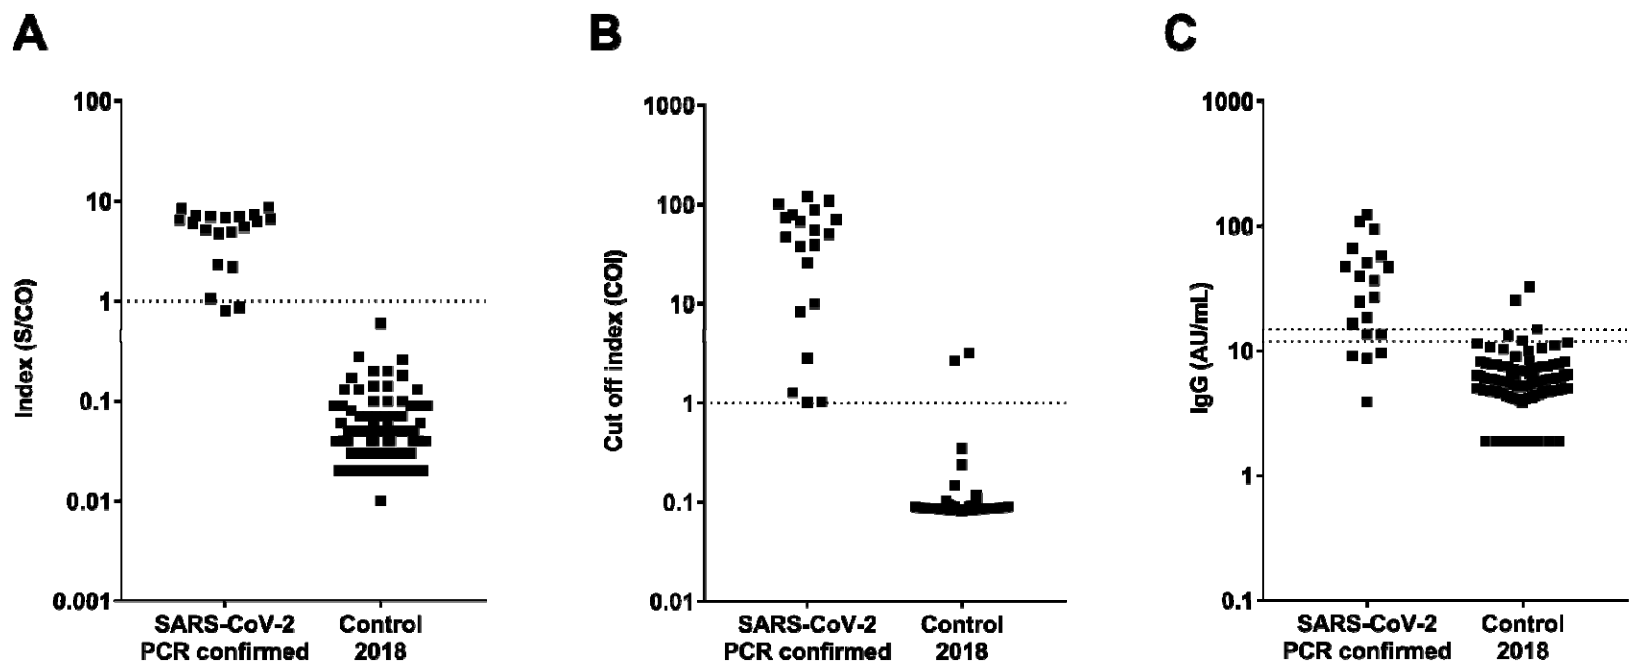

314

315 Figure 1.



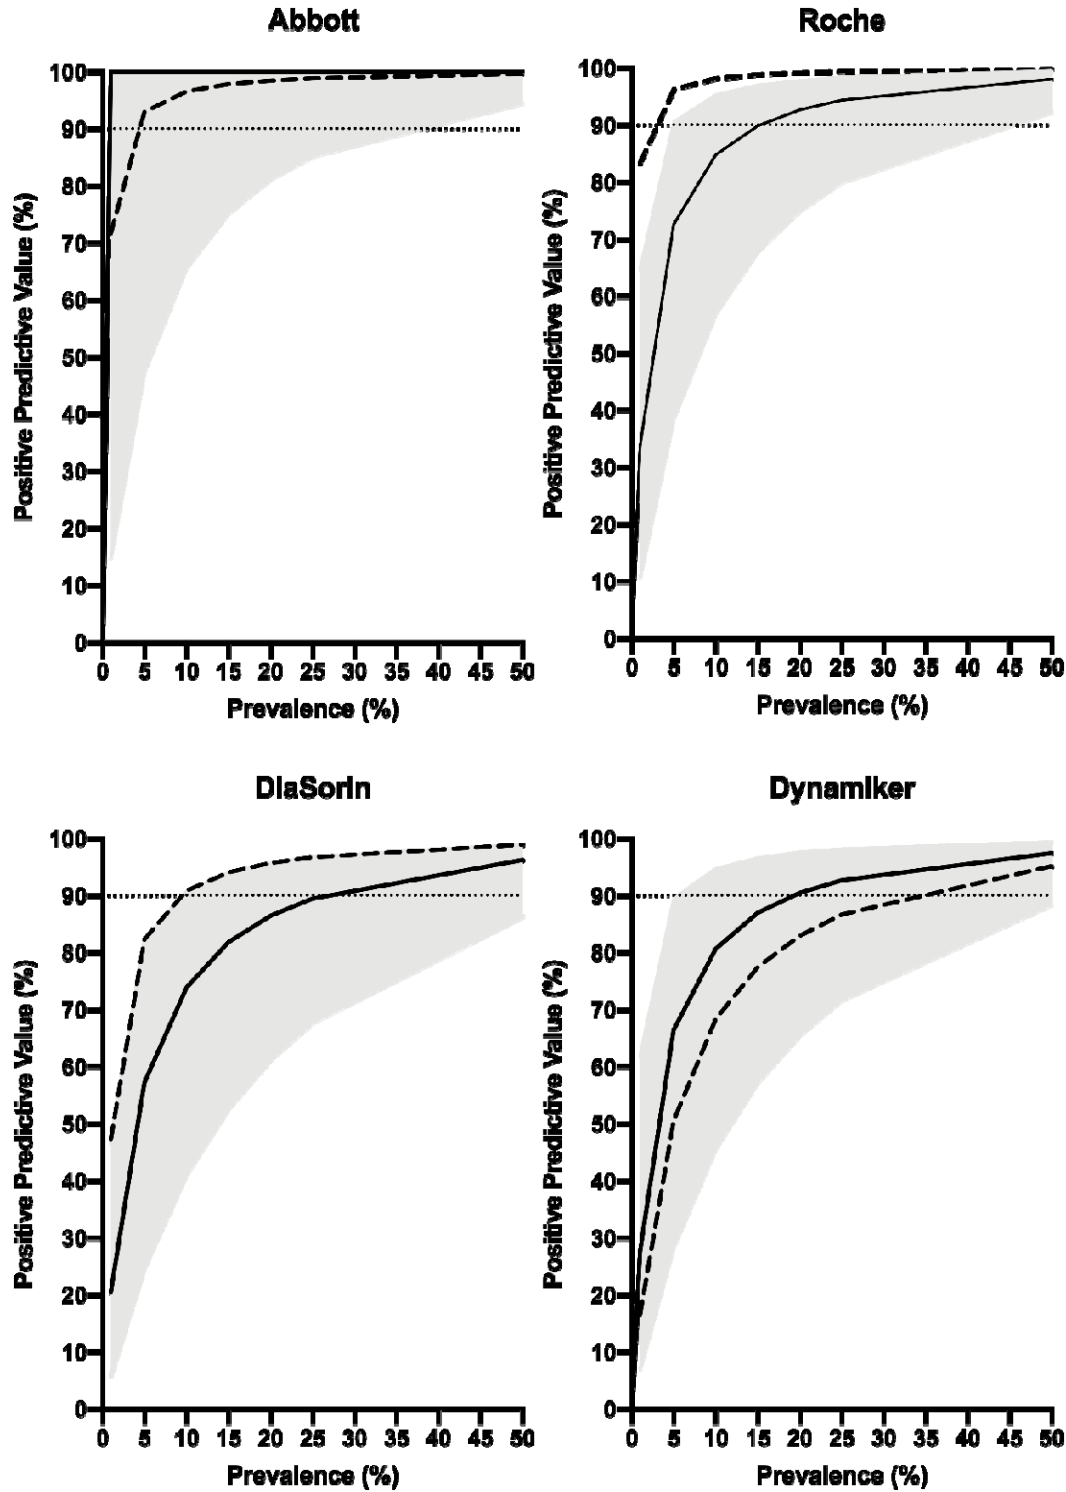

316

317 Figure 2.

318 **Figure captions**

319 Figure 1. Differences in distribution patterns between Abbott, Roche and DiaSorin immunoassays for  
320 detection of SARS-CoV-2 antibodies. Measured values from serology testing of 20 positive (SARS-  
321 CoV-2 PCR confirmed) and 100 negative (pre-pandemic 2018) samples. Dotted lines represent cut-off  
322 values of A) Abbott: positive result index  $\geq 1.4$  S/CO, B) Roche: positive cut-off index (COI)  $\geq 1.0$ ,  
323 and C) DiaSorin: positive cut-off  $\geq 15$  AU/mL and equivocal 12-15 AU/mL. In C negative samples  
324 with signals below detection limit (3.8 AU/ml) were plotted as 1.9 AU/mL.

325

326 Figure 2. Estimated PPV for the depicted assays, calculated at seroprevalences of 1%, 5%, 10%, 15%,  
327 20%, 25% and 50%. Calculations were based on sensitivity, specificity and their respective 95% CI  
328 limits from the current investigation (solid lines = mean values; grey areas = 95% CI). Dashed lines  
329 represent mean sensitivity and specificity data from the manufacturers' kit inserts. Dotted horizontal  
330 lines refer to 90% PPV.

331

332

333

334

335

336
